# Supplementary material
Source: publisher site journal article supplement (https://www.dovepress.com/article/299399)
Supplement: Supplementary file 1 [file get_supplementary_file.php]

**Differences in Lung Cancer Treatment Preferences among Oncologists, Patients and Family Members: A Semi-Structured Qualitative Study in China**

**Xiaoning He**, PhD; School of Pharmaceutical Science and Technology, Tianjin University, Tianjin, China; Center for Social Science Survey and Data, Tianjin University, Tianjin, China; hexn@tju.edu.cn

**Mengqian Zhang**, MS; School of Pharmaceutical Science and Technology, Tianjin University, Tianjin, China; Center for Social Science Survey and Data, Tianjin University, Tianjin, China; sunbeamqian@tju.edu.cn

**Jing Wu***, PhD, Professor; School of Pharmaceutical Science and Technology, Tianjin University, Tianjin, China; Center for Social Science Survey and Data, Tianjin University, Tianjin, China; jingwu@tju.edu.cn

**Song Xu**, PhD, Professor; Department of Lung Cancer Surgery, Tianjin Key Laboratory of Lung Cancer Metastasis and Tumor Microenvironment, Lung Cancer Institute, Tianjin Medical University General Hospital, Tianjin, China; xusong198@hotmail.com

**Xiangli Jiang**, Tianjin Medical University Cancer Institute & Hospital, Tianjin, China; jiangxiangli2007@outlook.com

**Ziping Wang**, PhD, Professor; Department of Medical Oncology, Cancer Institute (Hospital), Chinese Academy of Medical Sciences & Peking Union Medical College, Beijing, China; wangzp2007@126.com

**Shucai Zhang**, Department of Medical Oncology, Beijing Chest Hospital, Beijing, China; sczhang6304@163.com

**Feng Xie**, PhD, Professor, Department of Health Research Methods, Evidence and Impact, McMaster University, Hamilton, ON, Canada; Centre for Health Economics and Policy Analysis, McMaster University, Hamilton, ON, Canada; fengxie@mcmaster.ca

***Correspondence**: Jing Wu, PhD, Professor, School of Pharmaceutical Science and Technology, Tianjin University, No 92 Weijin Road, Nankai District, Tianjin, China, CO 300072. Tel: +862227405176, Fax: +862287401830, E-mail: [jingwu@tju.edu.cn](mailto:jingwu@tju.edu.cn).

**Supplementary Materials**

**Interview Guide for Oncologists**

| Ⅰ. Basic Information (No.: O-0 - Date: / ) | |
| --- | --- |
| Age |  |
| Gender | ◻ Male ◻ Female |
| Department |  |
| Academic Title |  |
| Practicing Years |  |
| Number of Patients Treated Monthly |  |

Ⅱ. Open-ended Questions

1. How do you introduce a treatment to your patients or their family members?

(*Probe*) What kind of information about the treatment will you give?

(*Prompt*) Will you describe the curative effects/side effects/drug administration way/cost of the treatment?

1. How many treatment options will you recommend? Why do you recommend the specific treatment?

(*Prompt*) Are there certain factors of recommended treatment which you value? What are they and why? (like effectiveness, side effects, cost, route of treatment etc.)

(*Probe*) What factors do you consider when weighing one treatment option against another?

1. What factors do you consider during your treatment decision-making process?

(*Probe*) Among them, what are more important and what are less important from your perspective?

(*Prompt*) Are/Is curative effects/side effects/drug administration route/cost more important?

(*Prompt*) Are/Is curative effects/side effects/drug administration route/cost less important?

1. What would your ideal treatment be?
2. Have patients or their family members expressed their expectations or worries for the treatment to you? What are they?

**Interview Guide for Patients**

| Ⅰ. Basic Information (No.: P-0 - Date: / ) | |
| --- | --- |
| Age |  |
| Gender | ◻ Male ◻ Female |
| Education Degree | ◻ Primary School and Below  ◻ Middle School  ◻ College and Above |
| Employment Status | ◻ Employed ◻ Unemployed ◻ Retired ◻ Others |
| Registered Residence | ◻ Urban ◻ Rural |
| Type of Medical Insurance | ◻ Urban Employee Basic Medical Insurance  ◻ Urban and Rural Resident Basic Medical Insurance  ◻ Other Commercial Medical Insurance  ◻ No Medical Insurance |
| Individual Monthly Income (CNY) | ◻ ≤2000 ◻ 2001-5000  ◻ 5001-10000 ◻ ＞10000 |

Ⅱ. Open-ended Questions

1. Please tell me about the treatment experience/process?

(*Probe*) What treatment do you have?

(*Probe*) How do you feel about the treatment? / How does the treatment affect your life?

(*Prompt*) Are there any symptoms or side effects during the treatment? What are they?

(*Prompt*) How much does the treatment cost?

1. How do you decide on the current treatment?

(*Probe*) Do you have any other treatment options? What are they?

(*Probe*) What made you to choose current treatment over others?

(*Prompt*) Do you choose current treatment because of its prominent extended survival/lower cost/lower adverse effects?

(*If patient have experienced two more treatments*) Why did you change the treatment? What are the differences between the previous one and the current one?

1. What factors do you consider during your treatment decision-making process?

(*Probe*) Among them, what are more important and what are less important from your perspective?

(*Prompt*) Are/Is curative effects/side effects/drug administration route/cost more important?

(*Prompt*) Are/Is curative effects/side effects/drug administration route/cost less important?

1. What would your ideal treatment be?
2. Have you expressed your expectations or worries for the treatment to oncologists or other people? What are they?

**Interview Guide for Family Members**

| Ⅰ. Basic Information (No.: F-0 - Date: / ) | |
| --- | --- |
| Age |  |
| Gender | ◻ Male ◻ Female |
| Relationship with patient |  |
| Disease stage of patient | ◻ Early  ◻ Locally Advanced  ◻ Advanced |
| Disease duration of patient | (Months) |
| Treatment experience of patient | ◻ Surgery  ◻ Chemotherapy  ◻ Radiotherapy  ◻ Targeted therapy  ◻ Immune therapy  ◻ Traditional Chinese Therapy  ◻ Other Supportive Therapy |
| Individual Monthly Income (CNY) | ◻ ≤2000 ◻ 2001-5000  ◻ 5001-10000 ◻ ＞10000 |

Ⅱ. Open-ended Questions

1. Please tell me about the treatment experience/process?

(*Probe*) What treatment do the patient have?

(*Probe*) How do you feel about the treatment? / How does the treatment affect your life?

(*Prompt*) Are there any symptoms or side effects during the treatment? What are they?

(*Prompt*) How much does the treatment cost?

1. How do you decide on the current treatment?

(*Probe*) Do you have any other treatment options? What are they?

(*Probe*) What made you to choose current treatment over others?

(*Prompt*) Do you choose current treatment because of its prominent extended survival/lower cost/lower adverse effects?

(*If patient have experienced two more treatments*) Why did you change the treatment? What are the differences between the previous one and the current one?

1. What factors do you consider during your treatment decision-making process?

(*Probe*) Among them, what are more important and what are less important from your perspective?

(*Prompt*) Are/Is curative effects/side effects/drug administration route/cost more important?

(*Prompt*) Are/Is curative effects/side effects/drug administration route/cost less important?

1. What would your ideal treatment be?
2. Have you expressed your expectations or worries for the treatment to oncologists or other people? What are they?
