# Supplementary material
Source: publisher site journal article supplement (https://www.dovepress.com/article/299399)
Supplement: Supplementary file 2 [file get_supplementary_file.php]

**Differences in Lung Cancer Treatment Preferences among Oncologists, Patients and Family Members: A Semi-Structured Qualitative Study in China**

**Xiaoning He**, PhD; School of Pharmaceutical Science and Technology, Tianjin University, Tianjin, China; Center for Social Science Survey and Data, Tianjin University, Tianjin, China; hexn@tju.edu.cn

**Mengqian Zhang**, MS; School of Pharmaceutical Science and Technology, Tianjin University, Tianjin, China; Center for Social Science Survey and Data, Tianjin University, Tianjin, China; sunbeamqian@tju.edu.cn

**Jing Wu***, PhD, Professor; School of Pharmaceutical Science and Technology, Tianjin University, Tianjin, China; Center for Social Science Survey and Data, Tianjin University, Tianjin, China; jingwu@tju.edu.cn

**Song Xu**, PhD, Professor; Department of Lung Cancer Surgery, Tianjin Key Laboratory of Lung Cancer Metastasis and Tumor Microenvironment, Lung Cancer Institute, Tianjin Medical University General Hospital, Tianjin, China; xusong198@hotmail.com

**Xiangli Jiang**, Tianjin Medical University Cancer Institute & Hospital, Tianjin, China; jiangxiangli2007@outlook.com

**Ziping Wang**, PhD, Professor; Department of Medical Oncology, Cancer Institute (Hospital), Chinese Academy of Medical Sciences & Peking Union Medical College, Beijing, China; wangzp2007@126.com

**Shucai Zhang**, Department of Medical Oncology, Beijing Chest Hospital, Beijing, China; sczhang6304@163.com

**Feng Xie**, PhD, Professor, Department of Health Research Methods, Evidence and Impact, McMaster University, Hamilton, ON, Canada; Centre for Health Economics and Policy Analysis, McMaster University, Hamilton, ON, Canada; fengxie@mcmaster.ca

***Correspondence**: Jing Wu, PhD, Professor, School of Pharmaceutical Science and Technology, Tianjin University, No 92 Weijin Road, Nankai District, Tianjin, China, CO 300072. Tel: +862227405176, Fax: +862287401830, E-mail: jingwu@tju.edu.cn.

Supplementary Table 1 Quota requirement

| Participants | Quota requirement | |
| --- | --- | --- |
| Oncologists | Gender | Female |
| Male |
| Academic title | Attending physician（Primary） |
| Physician in charge（Intermediate） |
| Associate chief physician or above（Sub-senior） |
| Patients | Gender | Female |
| Male |
| Age | ≤45 |
| 46-55 |
| 56-65 |
| ≥66 |
| Disease stage | Middle or below |
| Advanced |
| Registered residence | Urban |
| Rural |
| Education degree | Junior high school or below |
| Senior high school |
| College or above |

In order to meet the maximum variance principle, each group of each quota indicator had at least one sample.

Supplementary Table 2 Quota requirement of oncologists and patients

| Quota requirement | | Respondents No. | | | | | | | | | | |
| --- | --- | --- | --- | --- | --- | --- | --- | --- | --- | --- | --- | --- |
| Oncologists | | | | | Patients | | | | | |
| D1 | D2 | D3 | D4 | D5 | P1 | P2 | P3 | P4 | P5 | P6 |
| Gender | Female |  | √ | √ |  | √ |  |  |  | √ |  | √ |
| Male | √ |  |  | √ |  | √ | √ | √ |  | √ |  |
| Academic title | Attending physician（Primary） | √ | √ |  |  |  | — | | | | | |
| Physician in charge（Intermediate） |  |  |  |  | √ |
| Associate chief physician or above（Sub-senior） |  |  | √ | √ |  |
| Age | ≤45 | — | | | | |  |  |  | √ |  |  |
| 46-55 |  |  | √ |  | √ |  |
| 56-65 |  | √ |  |  |  | √ |
| ≥66 | √ |  |  |  |  |  |
| Disease stage | Middle or below | √ |  | √ |  |  |  |
| Advanced |  | √ |  | √ | √ | √ |
| Registered residence | Urban | √ | √ |  | √ |  | √ |
| Rural |  |  | √ |  | √ |  |
| Education degree | Junior high school or below |  |  |  |  | √ |  |
| Senior high school |  | √ | √ |  |  |  |
| College or above | √ |  |  | √ |  | √ |

In order to meet the maximum variance principle, each group of each quota indicator had at least one sample.

Supplementary Table3 Oncologists demographics

|  | Age | Gender | Department | Academic Title | Practicing years | No. of patients treated (Case/Month) |
| --- | --- | --- | --- | --- | --- | --- |
| O1 | 28 | Male | Surgical Oncology Department | Resident physician | 5 | 60 |
| O2 | 30 | Female | Medical Oncology Department | Resident physician | 5 | 80 |
| O3 | 36 | Female | Medical Oncology Department | Associate chief physician | 12 | 80 |
| O4 | 47 | Male | Medical Oncology Department | Associate chief physician | 22 | 100 |
| O5 | 33 | Female | Medical Oncology Department | Attending Physician | 12 | 300 |

Supplementary Table 4 Patients and family members demographics

|  | Age | Gender | Education degree | Employment status | Individual income  (CNY/month) | Registered residence | Insurance | Stage | Duration  (Month) | Treatment experience | Role of relative |
| --- | --- | --- | --- | --- | --- | --- | --- | --- | --- | --- | --- |
| P1 | 66 | Male | College | Retired | ＞10000 | Urban | UEBMI | locally advanced | — | Surgery | — |
| P2 | 65 | Male | Middle School | Retired | 2001-5000 | Urban | UEBMI | Advanced | 17 | Targeted therapy |
| P3 | 55 | Male | Middle School | Employed | 5001-10000 | Rural | UEBMI | locally advanced | 24 | Chemotherapy |
| P4 | 35 | Female | College | Employed | 2001-5000 | Urban | UEBMI | Advanced | 0.5 | Basic therapy |
| P5 | 51 | Male | Middle School | Unemployed | ≤2000 | Rural | URRBMI | Advanced | 16 | Targeted therapy  Chemotherapy  Immune therapy |
| P6 | 57 | Female | College | Retired | 5001-10000 | Urban | UEBMI | Advanced | 2 | Chemotherapy |
| R1 | 38 | Female | College | Employed | ＞10000 | — | | | | | Daughter |
| R2 | 65 | Female | College | Retirement | 2001~5000 | Wife |
| R3 | 55 | Female | Primary School | Unemployed | ≤2000 | Wife |
| R4 | 38 | Male | College | Employed | ＞10000 | Husband |
| R5 | 52 | Female | Middle School | Unemployed | ≤2000 | Wife |
| R6 | 32 | Female | College | Employed | ＞10000 | Daughter |

UEBMI, Urban Employee Basic Medical Insurance; URRBMI, Urban and Rural Resident Basic Medical Insurance.
